# Supplementary material
Source: PubMed Central journal article supplement (PMC2938116)
Supplement: supp_M110.000802_mcp.M110.000802-1.pdf [file supp_M110.000802_mcp.M110.000802-1.pdf]

## **Supplementary Information of**

### **Stress-induced phosphoprotein 1 as a secreted biomarker for human ovarian cancer promotes cancer cell proliferation**

Tzu-Hao Wang,<sup>1,2,3#</sup> Angel Chao,<sup>1#</sup> Chia-Lung Tsai,<sup>1#</sup> Chih-Long Chang,<sup>4</sup> Shun-Hua Chen,<sup>3</sup> Yun-Shien Lee,<sup>2,5</sup> Jen-Kun Chen,<sup>6,7</sup> Yi-Jun Lin,<sup>1</sup> Pi-Yueh Chang,<sup>8,9</sup> Chin-Jung Wang,<sup>1</sup> An-Shine Chao,<sup>1</sup> Shuenn-Dyh Chang,<sup>1</sup> Ting-Chang Chang,<sup>1</sup> Chyong-Huey Lai,<sup>1</sup> and Hsin-Shih Wang<sup>1,10</sup>

<sup>1</sup> Department of Obstetrics and Gynecology, Chang Gung Memorial Hospital and Chang Gung University, Tao-Yuan 333, Taiwan

<sup>2</sup> Genomic Medicine Research Core Laboratory (GMRCL), Chang Gung Memorial Hospital, Tao-Yuan 333, Taiwan

<sup>3</sup> Graduate Institute of Basic Medical Sciences, Chang Gung University, Tao-Yuan 333, Taiwan

<sup>4</sup> Department of Obstetrics and Gynecology, Mackay Memorial Hospital, Taipei, Taiwan

<sup>5</sup> Department of Biotechnology, Ming-Chuan University, Tao-Yuan 333, Taiwan;

<sup>6</sup> Clinical Proteomics Center, Chang Gung Memorial Hospital, Tao-Yuan 333, Taiwan

<sup>7</sup> Center for Nanomedicine Research, National Health Research Institute, Zhunan 35053, Taiwan.

<sup>8</sup> Department of Laboratory Medicine, Chang Gung Memorial Hospital, Tao-Yuan 333, Taiwan

<sup>9</sup> Department of Medical Biotechnology and Laboratory Science, Chang Gung University, Tao-Yuan 333, Taiwan

<sup>10</sup> Graduate Institute of Clinical Medical Sciences, Chang Gung University, Tao-Yuan 333, Taiwan

# Equally contributing authors (T.-H.W, A.C, C.-L.T).

\*To whom correspondence should be addressed (T.-H. W).

## **Contents:**

**Supplementary Methods (pp. 2-4)**

**Supplementary Figures (pp. 5-17)**

**Supplementary Tables (pp. 18-23)**

## **Supplementary Methods**

### **Two versions of STIP1 ELISA**

Originally, we developed an ELISA to determine serum levels of STIP1 using a chicken anti-human STIP1 polyclonal antibody (Abcam Laboratories, Cambridge, UK) as the capture antibody that was coated on 96-well plates (Nunc A/S, Roskilde, Denmark). Both human STIP1 recombinant protein and a mouse anti-human STIP1 monoclonal antibody were purchased from Abnova Corporation (Taipei, Taiwan). An HRP-conjugated sheep anti-mouse IgG antibody was purchased from Sigma-Aldrich (St Louis, MO), and the peroxidase substrate tetramethylbenzidine (TMB) was from Bethyl Laboratories (Montgomery, TX). However, after the supply of that chicken-origin antibody was discontinued for 6 months, the recent batch of that antibody did not work at all. Therefore, we had to develop the second version of the human STIP1 ELISA again.

Abnova Corporation (Taipei, Taiwan) has developed four monoclonal antibodies (MAb) against STIP1 protein, namely Clone 2E1, 2E11, 3A10 and 4H7. Each clone of antibody was further biotinylated for detection application. In our pilot study, 12 sandwich ELISA formats, each consisted of one MAb as capture Ab and another clone of biotinylated antibody as detecting Ab. The combination with highest signal at the highest point of the calibrator (100 ng/mL of STIP1 recombinant protein) and lowest background at the zero point was selected for final ELISA condition.

Briefly, ELISA plates (Nunc F8 MaxiSorp, A/S, Roskilde, Denmark) were coated with 2 µg/mL monoclonal antibodies (2E1, Abnova #H00010963-M33) in pH 9.6 carbonate-bicarbonate buffer at 4°C overnight and blocked with 250 µL/well of 0.05% Casein and 1% bovine serum albumin (BSA) in phosphate-buffered saline (PBS) at room temperature for 4 h. Calibrators, controls or patient serum and properly

diluted detection antibody (2E11, Abnova #H00010963-M35) were added simultaneously in coated well and incubated for 1h at 30°C. During the incubation period, a sandwich is formed consisting of solid phase antibody. After washing with 0.05% PBS-tween20, the Amdex streptavidin-peroxidase conjugated signal antibody was added (100 µL/well) and incubated for 1 h at 30°C. After washing, one hundred microtiters per well of TMB substrate was applied and color was developed for 10 min. The reaction was stopped by the addition of 100 µL/well of 1N H<sub>2</sub>SO<sub>4</sub>, and the color in the wells turned yellow. Absorbance was determined at 450 nm in a microplate spectrophotometer (Molecular Device SPECTRA Max model 190). The analyte concentrations were measured according to the calibration curve, for which recombinant human STIP1 was used as the calibrators. A calibration curve was prepared from 6 concentrations of calibrators, and the concentration of analyte in the serum specimen was determined by interpolation of 4-parameter curve fitting equation.

To compare whether the STIP1 values determined by the two versions of STIP1 ELISA were well correlated, we assayed the same batch of human sera (n=92) twice, each with one of these two ELISAs. Although different concentrations of STIP1 of the same specimen were derived from two versions of STIP1 ELISA, the results from these two ELISAs did show a good correlation, with  $R^2$  at 0.455 ( $P < 0.000001$ ).



**Supplementary Fig. 1. Annotated mass spectra of eight proteins (A-H)**

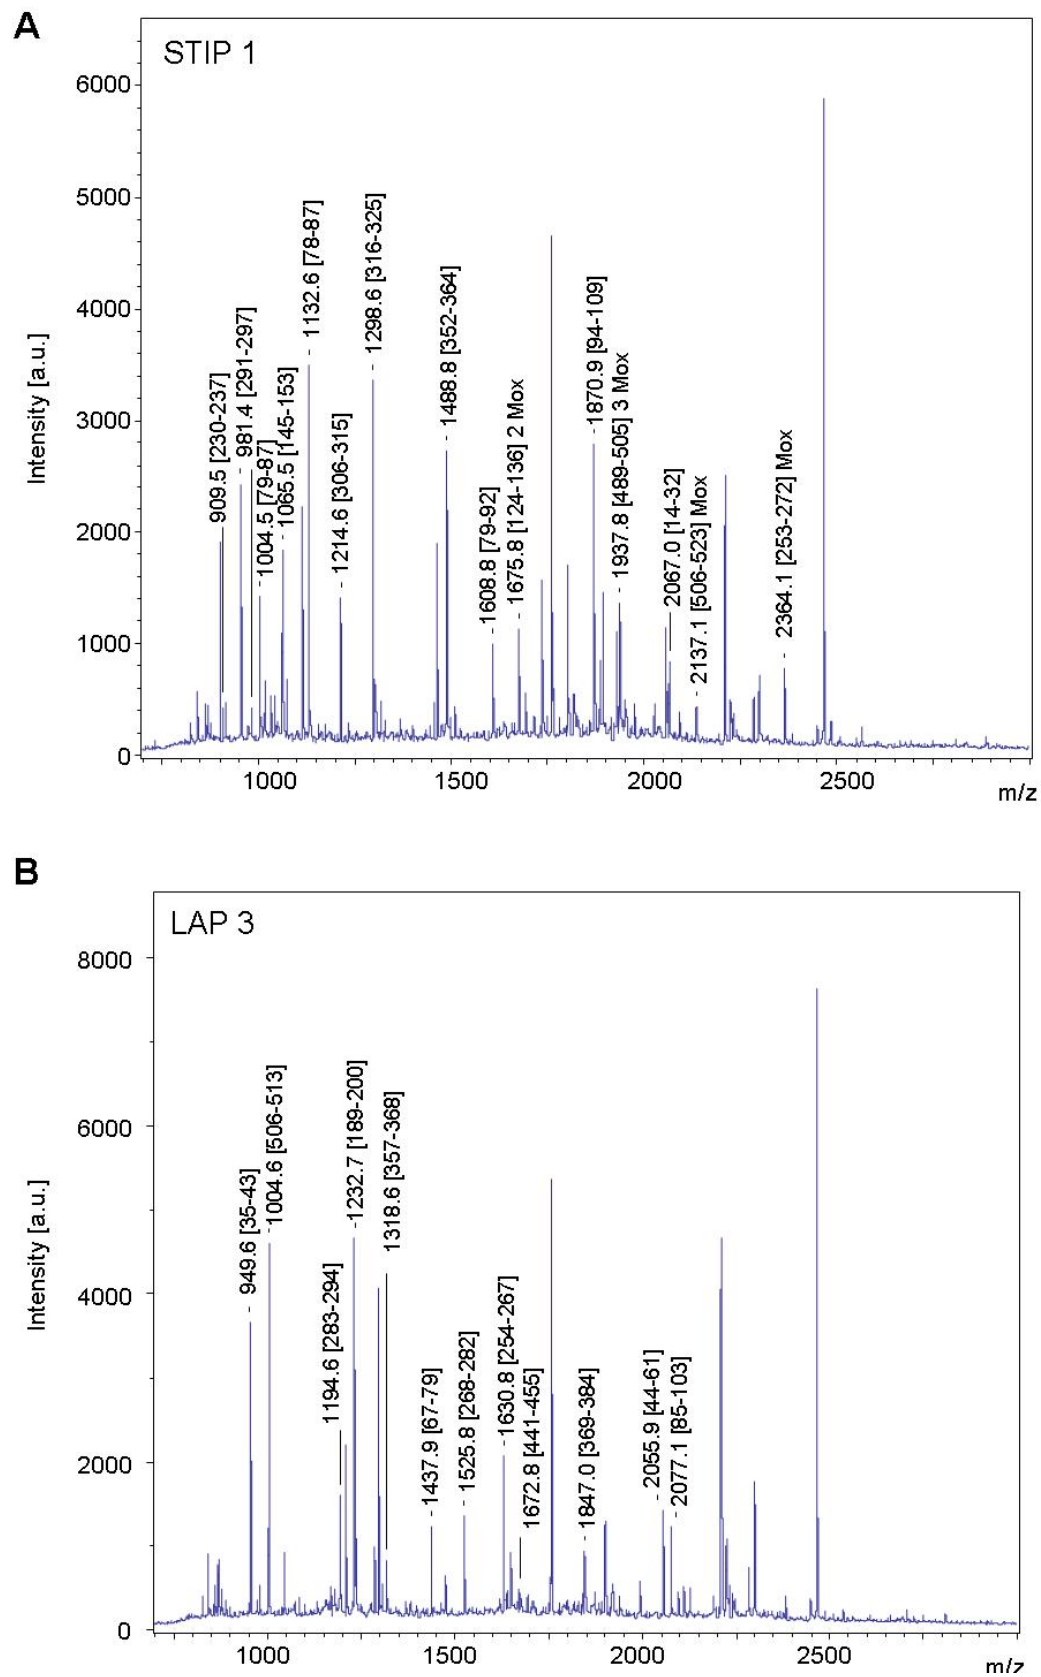

**Supplementary Fig. 1. Annotated mass spectra of eight proteins (A-H)**

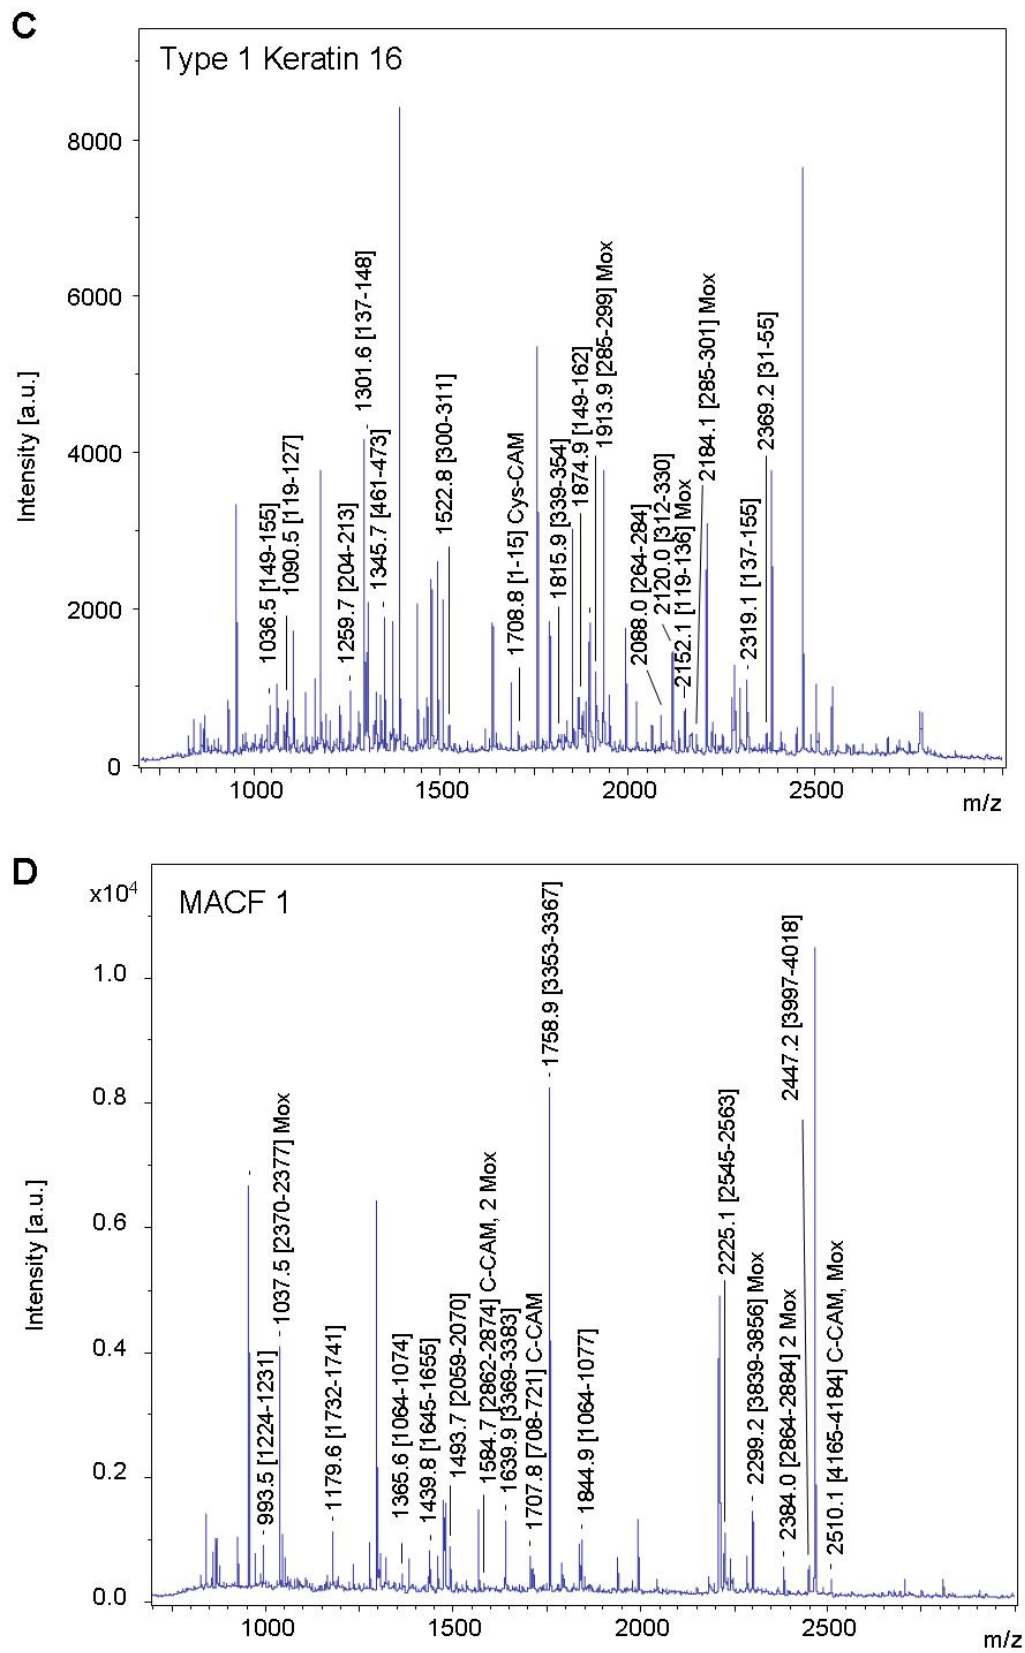

**Supplementary Fig. 1. Annotated mass spectra of eight proteins (A-H)**

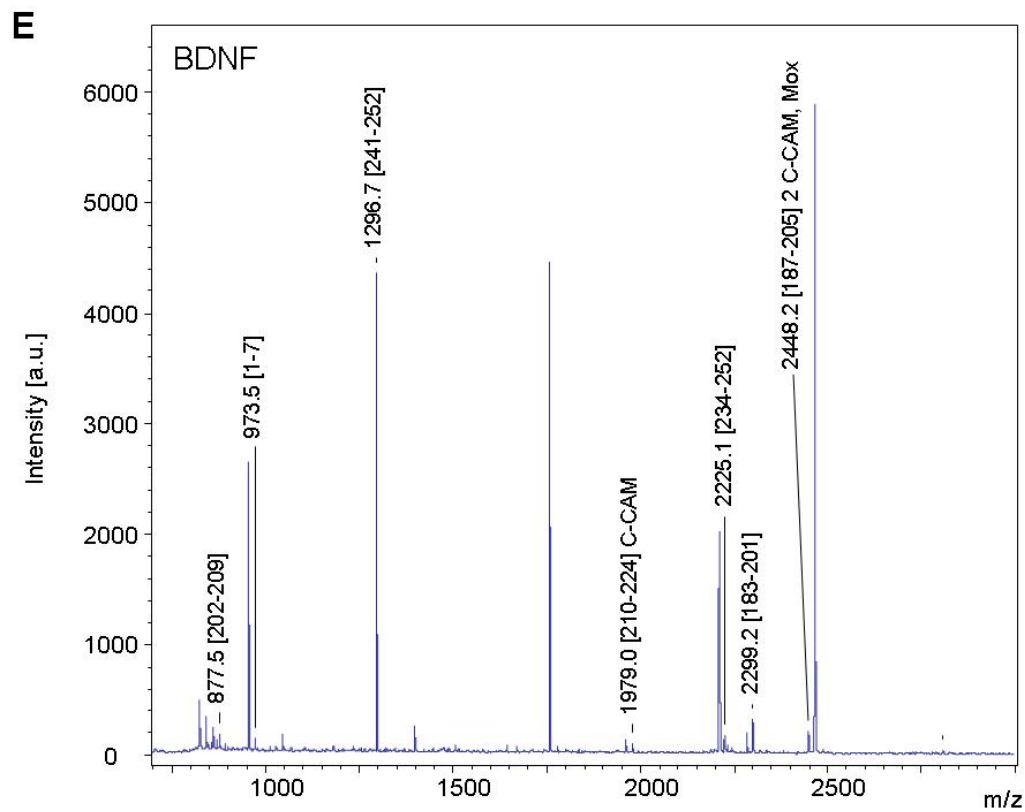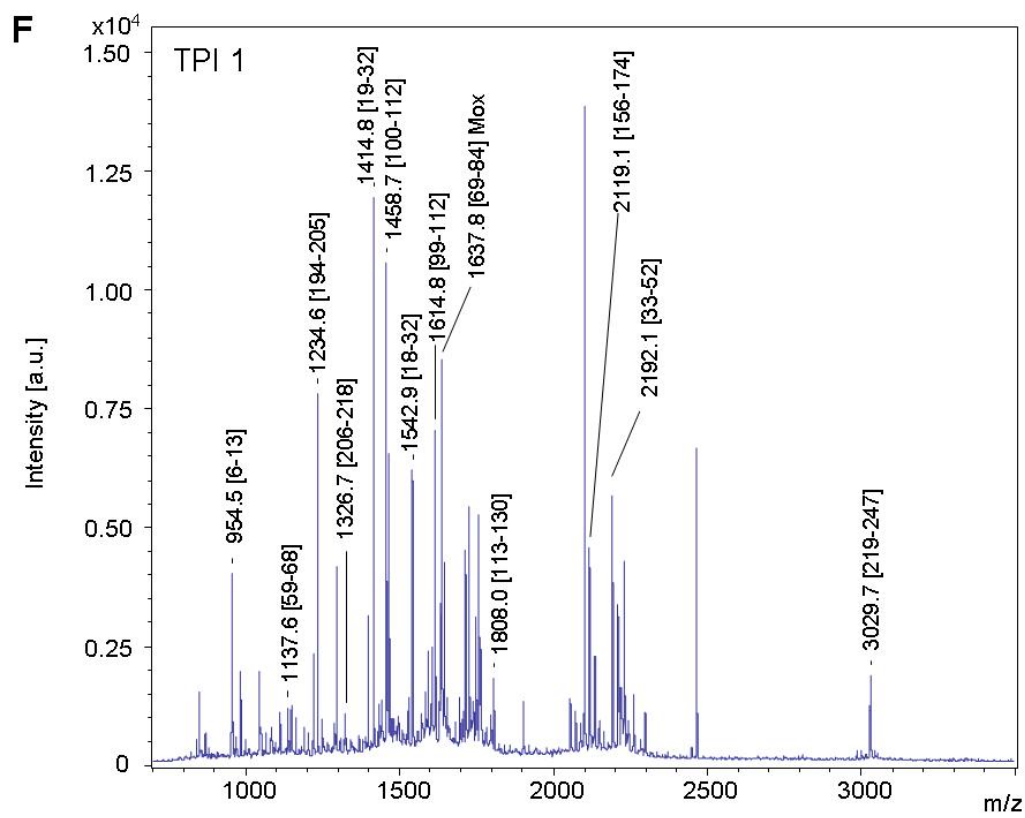

**Supplementary Fig. 1. Annotated mass spectra of eight proteins (A-H)**

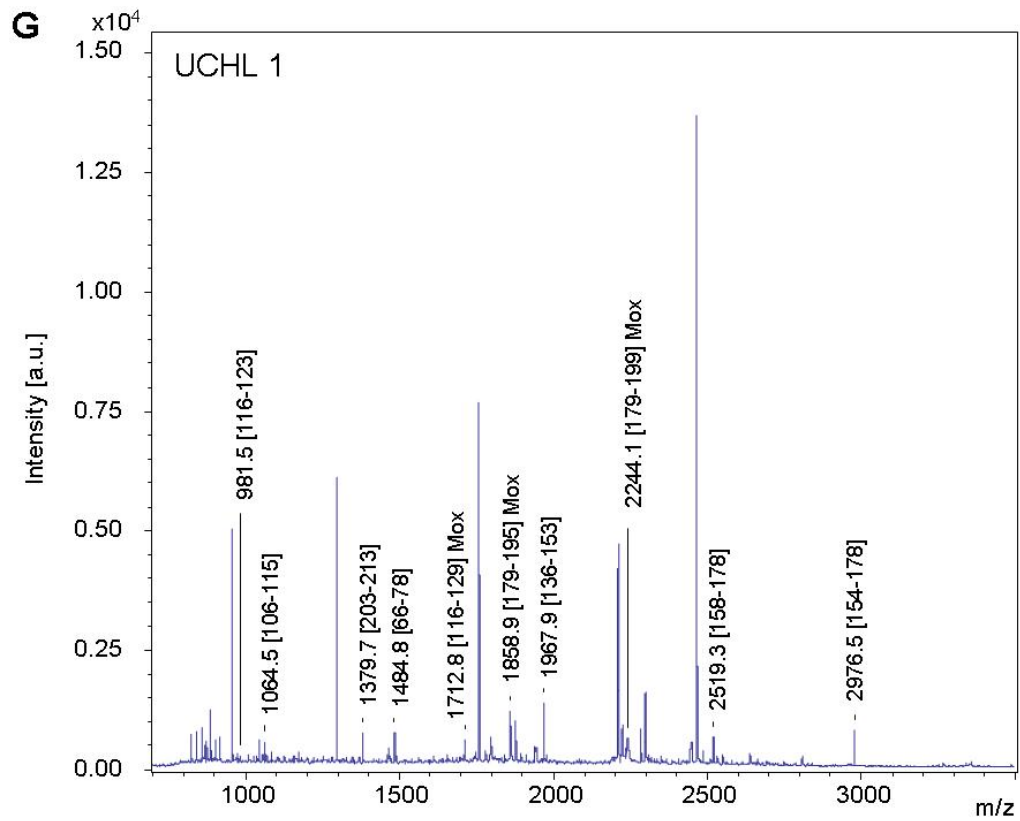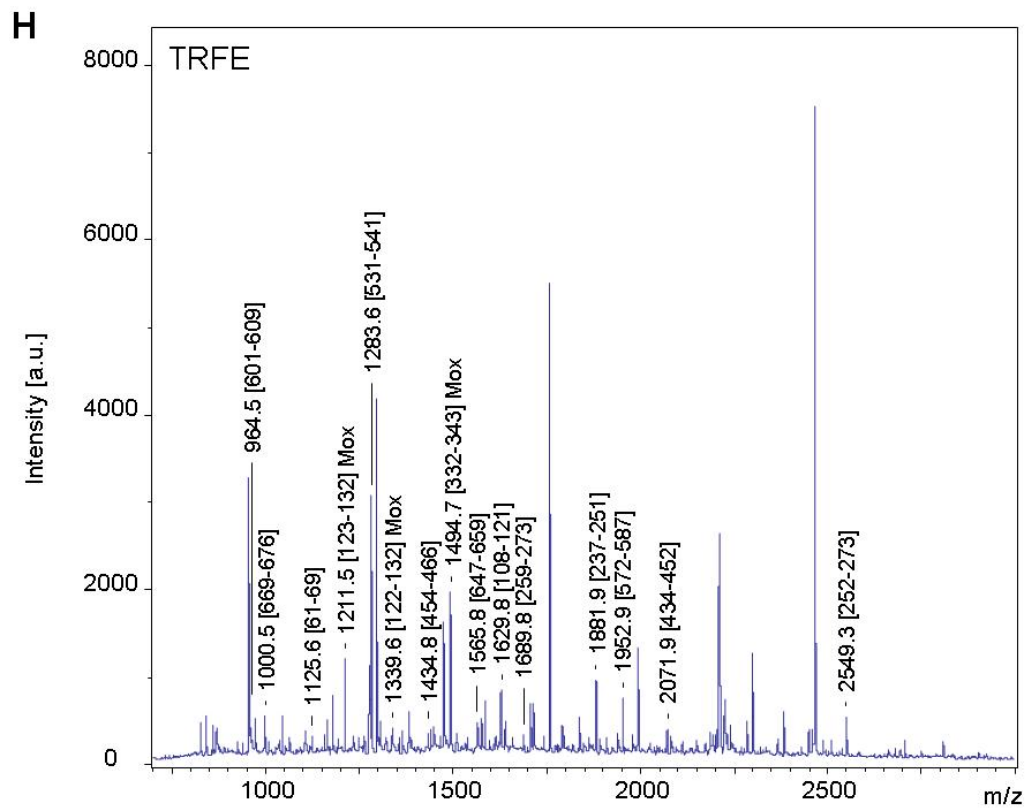

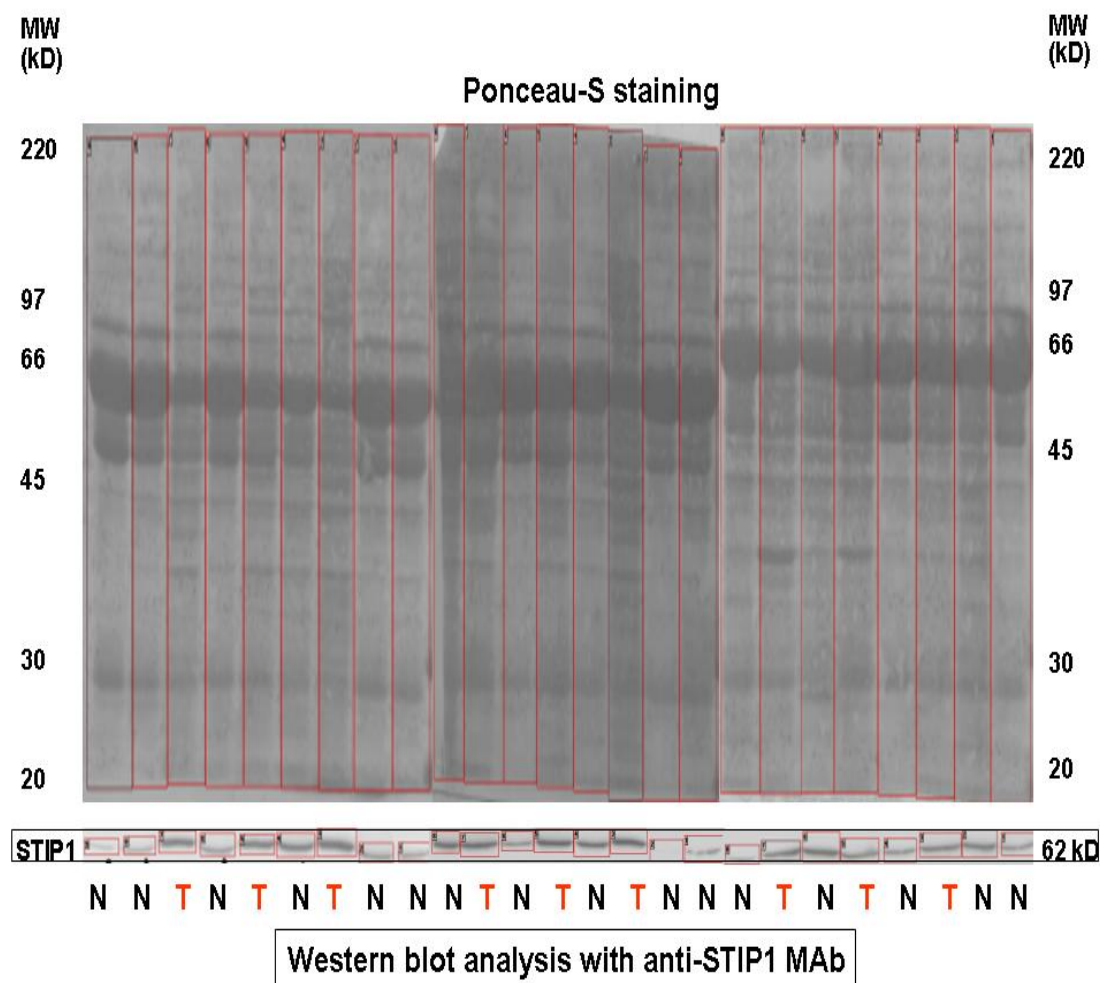

### Supplementary Fig. 2.

Twenty-five protein specimens were electrophoresed in three 10% SDS-PAGE, and were subsequently transferred to three nitrocellulose membranes (9, 8, and 8 specimens for gels 1, 2, and 3, respectively). After nitrocellulose membranes were stained with Ponceau S (upper panel), protein contents of the membranes were digitalized by scanning and analyzed with *Unscan-it* software. The intensity of STIP1 in each lane by western blot analyses (lower panel) was normalized with the intensity of Ponceau S, thereby all 25 specimens could be compared.

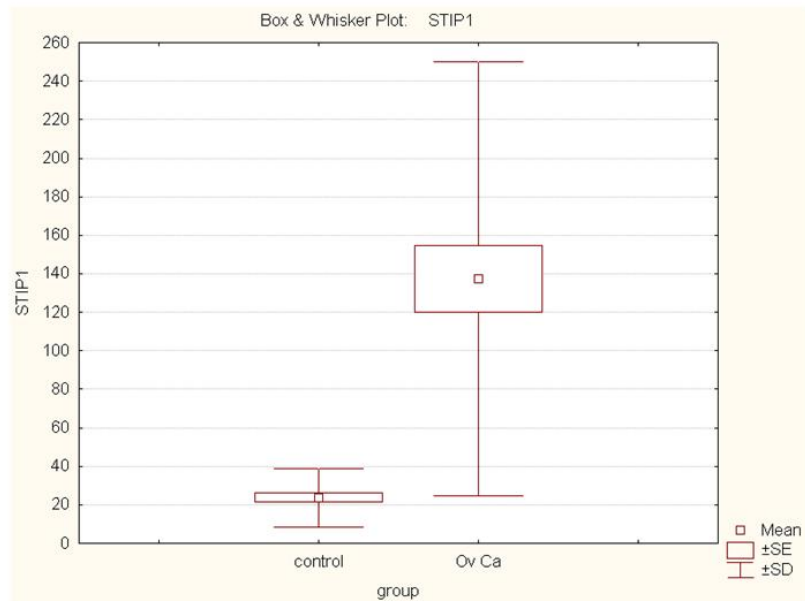

| T-tests; Grouping: group (CTR vs CA (2-19-2010)) |              |            |          |    |          |                 |               |                  |                |                   |             |
|--------------------------------------------------|--------------|------------|----------|----|----------|-----------------|---------------|------------------|----------------|-------------------|-------------|
| Group 1: control                                 |              |            |          |    |          |                 |               |                  |                |                   |             |
| Group 2: Ov Ca                                   |              |            |          |    |          |                 |               |                  |                |                   |             |
| Variable                                         | Mean control | Mean Ov Ca | t-value  | df | p        | Valid N control | Valid N Ov Ca | Std.Dev. control | Std.Dev. Ov Ca | F-ratio Variances | p Variances |
| STIP1                                            | 23.75581     | 137.3558   | -6.55268 | 84 | 0.000000 | 43              | 43            | 15.09578         | 112.6757       | 55.71212          | 0.000000    |

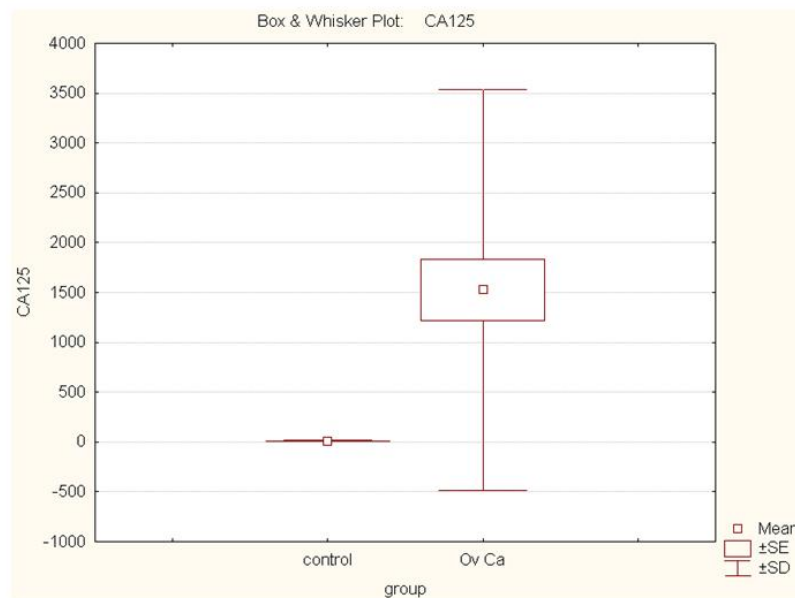

| T-tests; Grouping: group (CTR vs CA (2-19-2010)) |              |            |          |    |          |                 |               |                  |                |                   |             |
|--------------------------------------------------|--------------|------------|----------|----|----------|-----------------|---------------|------------------|----------------|-------------------|-------------|
| Group 1: control                                 |              |            |          |    |          |                 |               |                  |                |                   |             |
| Group 2: Ov Ca                                   |              |            |          |    |          |                 |               |                  |                |                   |             |
| Variable                                         | Mean control | Mean Ov Ca | t-value  | df | p        | Valid N control | Valid N Ov Ca | Std.Dev. control | Std.Dev. Ov Ca | F-ratio Variances | p Variances |
| CA125                                            | 12.62000     | 1526.509   | -4.92999 | 84 | 0.000004 | 43              | 43            | 8.440032         | 2013.626       | 56920.60          | 0.00        |

**Supplementary Fig. 3. Statistics of serum levels of STIP1 (upper panel) and**

**CA125 (lower panel) in the patients with ovarian cancer and age-matched controls.** Significant differences in both STIP1 ( $P < 0.000001$ ) and CA125 ( $P < 0.00001$ ) were detected between controls ( $n=43$ , control) and patients with ovarian cancer ( $n=43$ , Ov Ca) using Statistica 6.1 (StatSoft Inc., Tulsa, OK).



**Supplementary Fig. 4. No correlation between ages and serum levels of CA125.**

Correlations between serum levels of CA125 and individual ages were calculated in 43 healthy controls (upper panel) and 43 patients with ovarian cancer (lower panel) using Statistica 6.1 (StatSoft Inc., Tulsa, OK). No correlation was found in either the healthy control group ( $P=0.124$ ) or the ovarian cancer group ( $P=0.198$ ). Detailed data are presented in **Supplementary Table 4**.

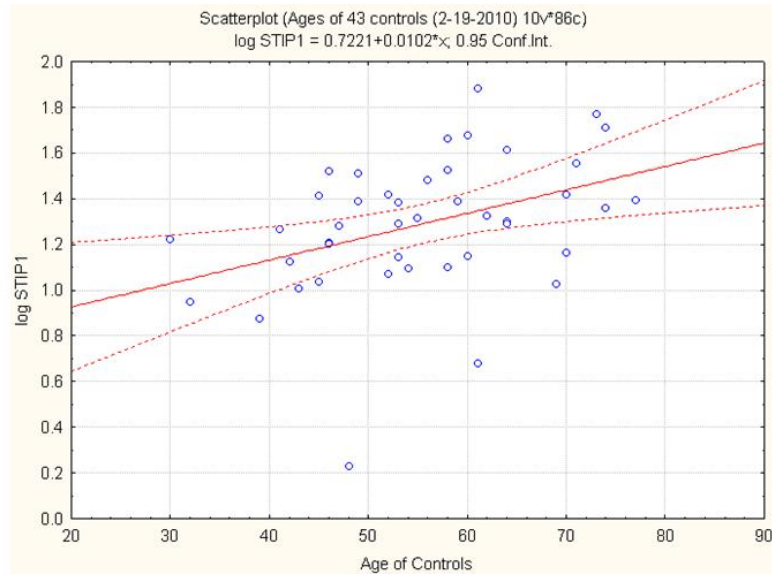

#### Multiple Regression Results

Dependent: **log STIP1** Multiple R = **.39143529** F = **7.418807**  
R2= **.15322159** df = **1,41**  
No. of cases: **43** adjusted R2= **.13256846** p = **.009441**  
Standard error of estimate: **.277783112**  
Intercept: **.722109388** Std.Error: **.2125908** t( **41**) = **3.3967** p = **.0015**

Age of Contro beta=.391

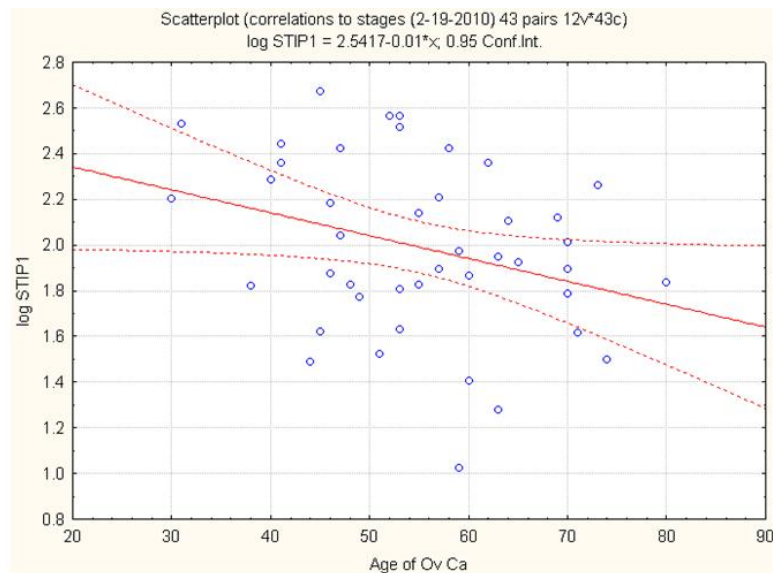

#### Multiple Regression Results

Dependent: **log STIP1** Multiple R = **.30799540** F = **4.296918**  
R2= **.09486117** df = **1,41**  
No. of cases: **43** adjusted R2= **.07278461** p = **.044507**  
Standard error of estimate: **.365871433**  
Intercept: **2.541693886** Std.Error: **.2716687** t( **41**) = **9.3559** p = **.0000**

Age of Ov Ca beta=-.31

**Supplementary Fig. 5. Significant correlations between age and the serum levels of STIP1 in non-cancer controls and patients with ovarian cancer.**

Correlations between serum levels of STIP1 and individual ages were calculated in 43 healthy controls (upper panel) and 43 patients with ovarian cancer (lower panel) using Statistica 6.1 (StatSoft Inc., Tulsa, OK). There were significant correlations in the healthy control group ( $P = 0.009$ ) and in the ovarian cancer group ( $P = 0.045$ ).

Detailed data are presented in **Supplementary Table 4**.

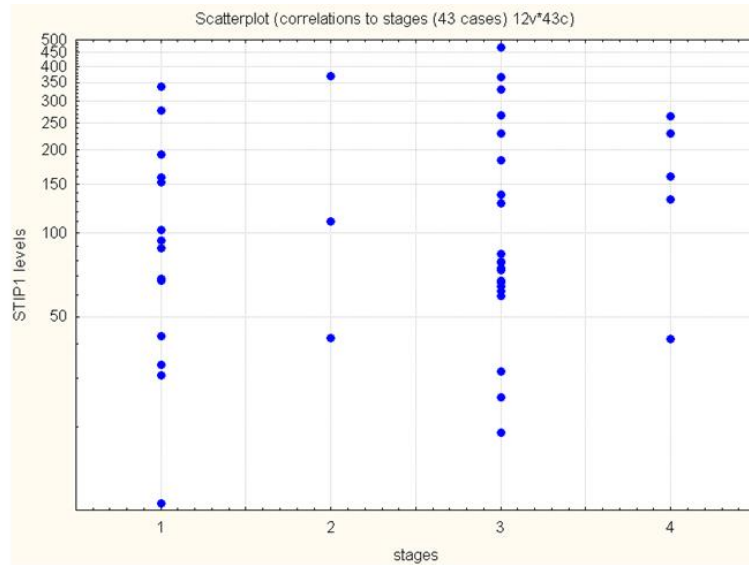

LSD test; variable STIP1 levels (correlations to stages)  
Probabilities for Post Hoc Tests  
Error: Between MS = 13345., df = 39.000

| Cell No. | stages | {1}      | {2}      | {3}      | {4}      |
|----------|--------|----------|----------|----------|----------|
| 1        | 1      | 118.66   | 173.43   | 137.96   | 165.52   |
| 2        | 2      | 0.460615 | 0.631068 | 0.440955 |          |
| 3        | 3      | 0.631068 | 0.621590 | 0.925749 | 0.634273 |
| 4        | 4      | 0.440955 | 0.925749 | 0.634273 |          |

Stages of ovarian cancer  
vs. STIP1 levels

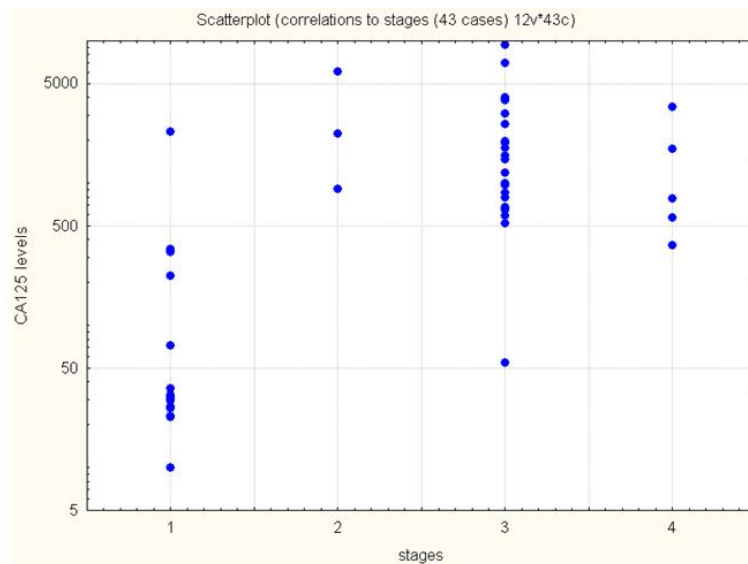

LSD test; variable CA125 levels (correlations to stages)  
Probabilities for Post Hoc Tests  
Error: Between MS = 3357E3, df = 39.000

| Cell No. | stages | {1}      | {2}      | {3}      | {4}      |
|----------|--------|----------|----------|----------|----------|
| 1        | 1      | 252.15   | 3099.5   | 2185.8   | 1381.7   |
| 2        | 2      | 0.019204 | 0.004003 | 0.243812 |          |
| 3        | 3      | 0.019204 | 0.424002 | 0.206755 | 0.383147 |
| 4        | 4      | 0.004003 | 0.243812 | 0.206755 | 0.383147 |

Stages of ovarian cancer  
vs. CA125 levels

**Supplementary Fig. 6.** There was no significant differences in the serum levels of STIP1 (upper panel) among four stages of ovarian cancer. On the other hand, the CA125 levels in the stage I of ovarian cancer were significantly lower than those of stages II to III (lower panel).

**Supplementary Table 1. Clinical information of the patients whose TIF was collected (n = 23).** Only nine cases (marked as **Y**) of serous adenocarcinoma of the ovary were included in the study.

| <b>TIF number</b> | <b>Age (y/o)</b> | <b>Pathology of the ovary</b>                         | <b>staging</b> | <b>Paired status</b> | <b>Inclusion in study</b> |
|-------------------|------------------|-------------------------------------------------------|----------------|----------------------|---------------------------|
| T 1               | 74               | Serous papillary adenocarcinoma                       | III            | -                    | <b>Y</b>                  |
| T2                | 34               | Endometrioid carcinoma, grade 1-2                     | IIIa           | -                    | no                        |
| T3                | 67               | Endometrioid carcinoma, poorly differentiated         | III            | -                    | no                        |
| T4                | 81               | Serous adenocarcinoma, poorly differentiated          | IV             | -                    | <b>Y</b>                  |
| T5                | 71               | Serous papillary adenocarcinoma                       | IIIc           | -                    | <b>Y</b>                  |
| T6                | 73               | Fibroma and thecoma                                   | benign         | -                    | no                        |
| T7                | 43               | Serous papillary adenocarcinoma                       | IIIc           | -                    | <b>Y</b>                  |
| T8                | 49               | Serous adenocarcinoma with focal clear cell carcinoma | IIIc           | -                    | no                        |
| T9                | 84               | Serous adenocarcinoma                                 | IIC            | -                    | <b>Y</b>                  |
| T10               | 48               | Mucinous adenocarcinoma, grade 1                      | Ia             | -                    | no                        |
| T11               | 41               | Endometrioid carcinoma, well-differentiated           | IIC            | -                    | no                        |
| T12               | 65               | Serous papillary adenocarcinoma                       | IIC            | -                    | <b>Y</b>                  |
| T13               | 51               | Serous papillary adenocarcinoma                       | IIC            | Paired with N19      | <b>Y</b>                  |
| T14               | 31               | Immature teratoma                                     | III            | -                    | no                        |
| T15               | 49               | Endometrioid adenocarcinoma, well-differentiated      | Ib             | -                    | no                        |
| T16               | 79               | Mucinous tumor, borderline                            | -              | -                    | no                        |

|     |    |                                                  |      |                 |          |
|-----|----|--------------------------------------------------|------|-----------------|----------|
| T17 | 22 | Mucinous adenocarcinoma, moderate-differentiated | IIIc | -               | no       |
| T18 | 33 | Mucinous tumor, borderline (grade 1)             | Ia   | -               | no       |
| T19 | 43 | Adenocarcinoma, high grade                       | IIIc | Paired with N16 | no       |
| T20 | 45 | Serous papillary carcinoma                       | IV   | -               | <b>Y</b> |
| T21 | 31 | Serous adenocarcinoma                            | IIc  | -               | <b>Y</b> |
| T22 | 55 | Clear cell carcinoma                             | IIIc | Paired with N18 | no       |
| T23 | 54 | Mucinous cystadenoma                             | -    | Paired with N17 | no       |

**Supplementary Table 2. Clinical information of the patients whose NIF was collected (n = 19).** Bilateral ovaries were negative for malignancy, except for three paired cases whose unilateral ovary was negative for malignancy. Sixteen cases of pathology-free ovaries were included in the study.

| <b>NIF number</b> | <b>Age (y/o)</b> | <b>Pathology of the disease</b>                                                    | <b>Staging (if applicable)</b> | <b>Paired status</b> | <b>Inclusion in study</b> |
|-------------------|------------------|------------------------------------------------------------------------------------|--------------------------------|----------------------|---------------------------|
| N1                | 49               | Uterine myoma                                                                      | -                              | -                    | <b>Y</b>                  |
| N2                | 40               | Cervical carcinoma                                                                 | Ib                             | -                    | <b>Y</b>                  |
| N3                | 37               | Endometrial carcinoma                                                              | Ib                             | -                    | <b>Y</b>                  |
| N4                | 60               | Endometrial carcinoma                                                              | Ic                             | -                    | <b>Y</b>                  |
| N5                | 52               | Endometrial carcinoma                                                              | Ia                             | -                    | <b>Y</b>                  |
| N6                | 54               | Endometrial carcinoma                                                              | IV                             | -                    | <b>Y</b>                  |
| N7                | 37               | Endometrial carcinoma                                                              | IIa                            | -                    | <b>Y</b>                  |
| N8                | 46               | Endometrial carcinoma                                                              | II                             | -                    | <b>Y</b>                  |
| N9                | 40               | adenomyosis                                                                        | -                              | -                    | <b>Y</b>                  |
| N10               | 49               | Endometrial carcinoma (well differentiated)                                        | -                              | -                    | <b>Y</b>                  |
| N11               | 49               | CIN3 of the cervix                                                                 | -                              | -                    | <b>Y</b>                  |
| N12               | 50               | Cervical cancer                                                                    | Ib2                            | -                    | <b>Y</b>                  |
| N13               | 52               | Uterine carcinosarcoma                                                             | IIIc                           | -                    | <b>Y</b>                  |
| N14               | 48               | Adenocarcinoma of the cervix                                                       | Ib1                            | -                    | <b>Y</b>                  |
| N15               | 45               | Squamous cell carcinoma of the cervix (poorly differentiated)                      | Ib                             | -                    | <b>Y</b>                  |
| N16               | 43               | Adenocarcinoma of left ovary, right ovary was free for malignancy                  | IIIc                           | Paired with T19      | no                        |
| N17               | 54               | Mucinous cystadenoma of right ovary, left ovary was free for tumor                 | -                              | Paired with T23      | <b>Y</b>                  |
| N18               | 55               | Clear cell carcinoma of right ovary, left ovary was free of malignancy             | IIIc                           | Paired with T22      | no                        |
| N19               | 51               | Serous papillary adenocarcinoma of right ovary, left ovary was free for malignancy | IIC                            | Paired with T13      | no                        |

**Supplementary Table 3. Protein identification by peptide fingerprint.**

| Protein Name                                              | Gene name         | Accession Number | MASCOT Score | sequence coverage (%) | # of matched peaks | # of unmatched peaks |
|-----------------------------------------------------------|-------------------|------------------|--------------|-----------------------|--------------------|----------------------|
| Stress-induced-phosphoprotein 1                           | STIP1             | gil5803181       | 190          | 44                    | 26                 | 46                   |
| Leucine aminopeptidase                                    | LAP3              | gil4335941       | 200          | 48                    | 21                 | 45                   |
| Type I keratin 16                                         | Type I Keratin 16 | gil1195531       | 75           | 53                    | 26                 | 110                  |
| Macrophin 1 isoform 2                                     | MACF1             | gil17426164      | 76           | 14                    | 53                 | 32                   |
| Brain-derived neurotrophic factor isoform b preproprotein | BDNF              | gil25306235      | 67           | 35                    | 9                  | 18                   |
| Triosephosphate Isomerase                                 | TPI 1             | gil999892        | 172          | 85                    | 20                 | 112                  |
| Ubiquitin carboxyl-terminal esterase L1                   | UCHL1             | gil21361091      | 138          | 58                    | 12                 | 66                   |
| Transferrin                                               | TRFE              | gil4557871       | 147          | 33                    | 23                 | 59                   |

**Supplementary Table 4. Detailed clinical information and serum concentrations of CA125 and STIP1 in forty three pairs of age-matched ovarian cancer patients and healthy controls**

| Cancer No. | Age | Cancer Stage | Histopathology                                            | CA125  | STIP1 ng/mL | Normal No. | Age | CA125 | STIP1 ng/mL |
|------------|-----|--------------|-----------------------------------------------------------|--------|-------------|------------|-----|-------|-------------|
| Ca 1       | 53  | I B          | serous adenocarcinoma                                     | 36.2   | 42.6        | N 1        | 53  | 3.4   | 13.9        |
| Ca 2       | 71  | IV           | serous adenocarcinoma                                     | 366.6  | 41.6        | N 2        | 71  | 26.2  | 36.1        |
| Ca 3       | 70  | III C        | serous adenocarcinoma                                     | 1965.3 | 78.5        | N 3        | 70  | 31.2  | 26.2        |
| Ca 4       | 63  | III B        | mixed clear cell and serous adenocarcinoma                | 6979.3 | 19.0        | N 4        | 64  | 13.8  | 19.9        |
| Ca 5       | 53  | III C        | mucinous adenocarcinoma                                   | 4043.4 | 64.5        | N 5        | 53  | 11.0  | 19.6        |
| Ca 6       | 55  | III C        | serous adenocarcinoma                                     | 593.8  | 138.3       | N 6        | 55  | 4.6   | 20.7        |
| Ca 7       | 46  | III C        | serous adenocarcinoma                                     | 1190.9 | 74.8        | N 7        | 46  | 14.5  | 16.1        |
| Ca 8       | 74  | III C        | adenocarcinoma                                            | 1556.9 | 31.6        | N 8        | 74  | 8.5   | 51.4        |
| Ca 9       | 58  | IV           | serous adenocarcinoma                                     | 778.7  | 264.2       | N 9        | 58  | 7.7   | 12.6        |
| Ca 10      | 31  | I C          | endometrioid adenocarcinoma with mucinous differentiation | 225.3  | 338.3       | N 10       | 32  | 18.3  | 8.9         |
| Ca 11      | 60  | III C        | serous adenocarcinoma                                     | 1774.0 | 73.3        | N 11       | 60  | 13.2  | 47.7        |
| Ca 12      | 38  | III C        | papillary serous adenocarcinoma                           | 54.8   | 66.5        | N 12       | 39  | 25.0  | 7.5         |
| Ca 13      | 57  | IV           | papillary serous adenocarcinoma                           | 1758.0 | 160.8       | N 13       | 58  | 6.8   | 33.6        |
| Ca 14      | 59  | I C          | clear cell carcinoma                                      | 343.2  | 94.5        | N 14       | 59  | 11.5  | 24.5        |
| Ca 15      | 41  | IV           | serous adenocarcinoma                                     | 3433.0 | 228.6       | N 15       | 43  | 26.1  | 10.2        |
| Ca 16      | 60  | III C        | serous adenocarcinoma                                     | 3815.8 | 25.6        | N 16       | 61  | 16.5  | 76.7        |
| Ca 17      | 47  | III C        | clear cell adenocarcinoma                                 | 680.4  | 266.3       | N 17       | 47  | 15.2  | 19.2        |
| Ca 18      | 45  | III C        | serous adenocarcinoma                                     | 800.0  | 469.2       | N 18       | 45  | 11.9  | 26          |
| Ca 19      | 53  | II A         | serous adenocarcinoma                                     | 2242.9 | 368.2       | N 19       | 54  | 6.2   | 12.5        |
| Ca 20      | 73  | III C        | serous adenocarcinoma                                     | 1900.2 | 183.5       | N 20       | 73  | 34.9  | 59.1        |

|       |    |       |                                                   |        |       |      |    |      |      |
|-------|----|-------|---------------------------------------------------|--------|-------|------|----|------|------|
| Ca 21 | 51 | I C   | serous adenocarcinoma                             | 331.5  | 33.4  | N 21 | 52 | 18.2 | 11.8 |
| Ca 22 | 48 | III C | serous adenocarcinoma                             | 974.0  | 67.2  | N 22 | 49 | 6.3  | 32.3 |
| Ca 23 | 80 | I C   | mucinous adenocarcinoma                           | 22.8   | 68.8  | N 23 | 77 | 3.1  | 24.7 |
| Ca 24 | 57 | III C | serous adenocarcinoma                             | 854.9  | 79.0  | N 24 | 58 | 6.1  | 46.1 |
| Ca 25 | 53 | III B | clear cell carcinoma                              | 3087.9 | 330.1 | N 25 | 53 | 3.9  | 24.2 |
| Ca 26 | 69 | IV    | serous adenocarcinoma                             | 572.2  | 132.4 | N 26 | 69 | 25.3 | 10.6 |
| Ca 27 | 59 | I C   | serous adenocarcinoma                             | 2319.6 | 10.6  | N 27 | 60 | 16.3 | 14.1 |
| Ca 28 | 44 | I C   | clear cell adenocarcinoma                         | 72.3   | 31    | N 28 | 46 | 11.9 | 16   |
| Ca 29 | 47 | II C  | tubal cancer                                      | 919.6  | 110   | N 29 | 48 | 15.4 | 1.7  |
| Ca 30 | 49 | III C | serous adenocarcinoma                             | 2613.1 | 59    | N 30 | 49 | 6.9  | 24.5 |
| Ca 31 | 45 | II A  | endometrioid adenocarcinoma                       | 6136.0 | 42    | N 31 | 46 | 23.8 | 33.1 |
| Ca 32 | 62 | III C | papillary serous adenocarcinoma                   | 647.0  | 229.1 | N 32 | 64 | 3.0  | 19.6 |
| Ca 33 | 70 | III C | papillary serous adenocarcinoma                   | 1476.0 | 61.6  | N 33 | 74 | 4.2  | 22.8 |
| Ca 34 | 65 | III C | papillary serous adenocarcinoma                   | 9376.0 | 84.5  | N 34 | 64 | 2.8  | 41.0 |
| Ca 35 | 64 | III C | serous adenocarcinoma                             | 524.4  | 128.2 | N 35 | 62 | 1.4  | 21.2 |
| Ca 36 | 52 | III C | serous adenocarcinoma                             | 994.7  | 367.0 | N 36 | 52 | 4.6  | 26.1 |
| Ca 37 | 55 | I A   | borderline mucinous tumor                         | 10.1   | 67.5  | N 37 | 56 | 4.7  | 30.4 |
| Ca 38 | 70 | I B   | adenocarcinoma, mixed clear cell and serous types | 26.2   | 102.7 | N 38 | 70 | 8.9  | 14.6 |
| Ca 39 | 41 | I A   | mucinous cystadenocarcinoma                       | 31.1   | 278.3 | N 39 | 41 | 13.2 | 18.5 |
| Ca 40 | 40 | I A   | mucinous cystadenocarcinoma                       | 29.4   | 192.8 | N 40 | 42 | 23.6 | 13.3 |
| Ca 41 | 46 | I A   | borderline mucinous tumor                         | 27.1   | 153.2 | N 41 | 45 | 11.9 | 10.9 |
| Ca 42 | 30 | I B   | borderline mucinous tumor                         | 23.1   | 159.1 | N 42 | 30 | 13.7 | 16.8 |
| Ca 43 | 63 | I A   | mucinous adenocarcinoma                           | 32.2   | 88.7  | N 43 | 61 | 7.0  | 4.8  |
